# Supplementary material for: Seasonal features and origins of carbonaceous aerosols at Syowa Station, Antarctica
Source: Copernicus journal article supplement (doi:10.5194/acp-2018-1190), 2019-01-07
Supplement: Supplementary file 1 [file acp-2018-1190-supplement.pdf]

*Supplementary information*

## **Seasonal features and origins of carbonaceous aerosols at Syowa Station, Antarctica**

Keiichiro Hara<sup>1</sup>, Kengo Sudo<sup>2</sup>, Takato Ohnishi<sup>2</sup>, Kazuo Osada<sup>2</sup>, Masanori Yabuki<sup>3</sup>, Masataka Shiobara<sup>4</sup>, Takashi Yamanouchi<sup>4</sup>

<sup>1</sup>Department of Earth System Science, Faculty of Science, Fukuoka University, Fukuoka, 814-0180, Japan

<sup>2</sup>Graduate School of Environmental Studies, Nagoya University, Nagoya, 464-8601, Japan

<sup>3</sup>Research Institute for Sustainable Humanosphere, Kyoto University, Kyoto, 611-0011, Japan

<sup>4</sup>National Institute of Polar Research, Tokyo, 190-0014, Japan

*Correspondence to:* Keiichiro Hara (harakei@fukuoka-u.ac.jp)

### Weingartner's correction procedure of BC mass concentrations

In an aethalometer, BC concentrations are measured by light attenuation resulting from optical absorption of BC collected on the filter tape. As earlier works have suggested (e.g., Weingartner et al., 2003; Bond et al., 2013), the filter-based BC measurements have scattering and shadowing effects that can engender error of BC measurements. Therefore, we used Weingartner's procedures for this study to correct BC concentrations (Weingartner et al., 2003). In Weingartner's procedure, BC concentrations were corrected using the following procedures. Light attenuation (ATN) is denoted as

$$ATN \equiv \ln \frac{I_0}{I}, \quad (1)$$

where  $I_0$ , and  $I$  respectively represent the light intensity incident to the filter, and the light intensity after passing through the filter spot. The optical attenuation coefficient ( $b_{ATN}$ ) is calculated using the following equation.

$$b_{ATN} = \frac{A \Delta ATN}{Q \Delta t} \quad (2)$$

Therein,  $A$ ,  $Q$ ,  $\Delta t$ , and  $\Delta ATN$  respectively represent the spot area, flow rate, time interval, and attenuation change. Then, mass BC concentrations ( $M_{BC}$ ) are estimated and corrected as

$$M_{BC} = \frac{b_{abs}}{\sigma_{abs}} = \frac{b_{ATN}}{\sigma_{ATN} \left( \left( \frac{1}{f} - 1 \right) \frac{\ln ATN - \ln(10\%)}{\ln(50\%) - \ln(10\%)} + 1 \right)}, \quad (3)$$

where  $b_{abs}$ ,  $\sigma_{abs}$ , and  $\sigma_{ATN}$  respectively denote the optical absorption coefficient, mass specific optical absorption cross-section, and mass specific attenuation cross-section. Correction parameter  $f$  is estimated using the following relation.

$$f = a(1 - \omega_0) + 1 \quad (4)$$

In that equation,  $\omega_0$  is the single scattering albedo. The determined parameters  $a$  are 0.87 ( $\lambda = 450$  nm) and 0.85 ( $\lambda = 660$  nm). Because of the low BC concentrations detected at Antarctic coasts,  $\omega_0$  was

found mostly as 0.97–0.99 at Syowa Station (Yabuki et al., preparation for publication). Similar values of  $\omega_0$  were measured also at Neumayer (Weller et al., 2013). Therefore,  $f$  values can be 1.02–1 using our measurement conditions. Here, we used 1.01 as the  $f$  values. Furthermore,  $\Delta t$  was 120 min (2 hr) in this study because of lower BC concentrations. The corrected BC concentrations were estimated for all BC data (recorded every 15 min) in this study. In aethalometer measurements using AE31,  $\sigma_{\text{ATN}}$  is  $14625 \text{ nm m}^2 \text{ g}^{-1} \lambda^{-1}$ .

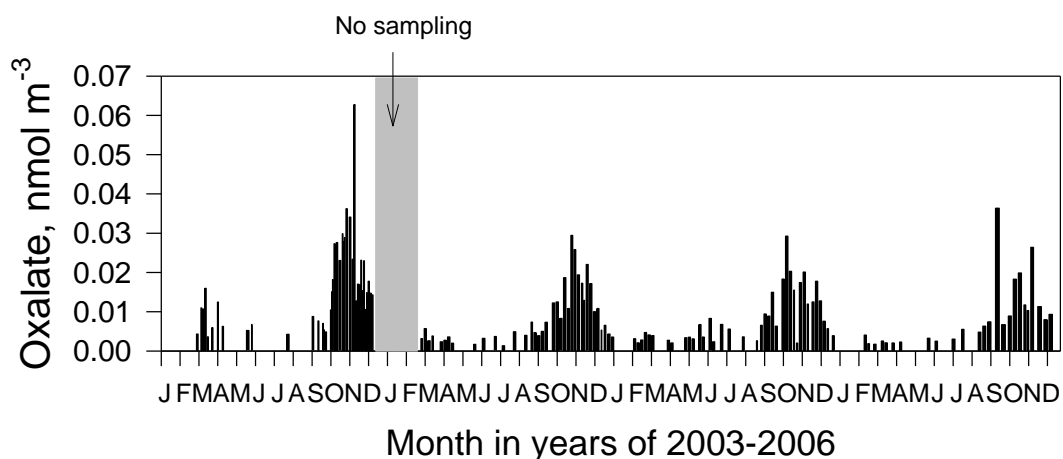

**Figure S1: Seasonal variation of oxalate concentration in aerosols at Syowa Station, Antarctica.**

Non-size-segregated aerosol sampling was done at Syowa Station, Antarctica. Aerosol sampling in 2003 and 2004–2006 was conducted, respectively, at an atmospheric observatory and clean air observatory because the clean air observatory was built in January 2004. Aerosol sampling was controlled using a wind selector to avoid local contamination. Sampling and analytical procedures were applied in accordance with Hara et al. (2004, 2010).

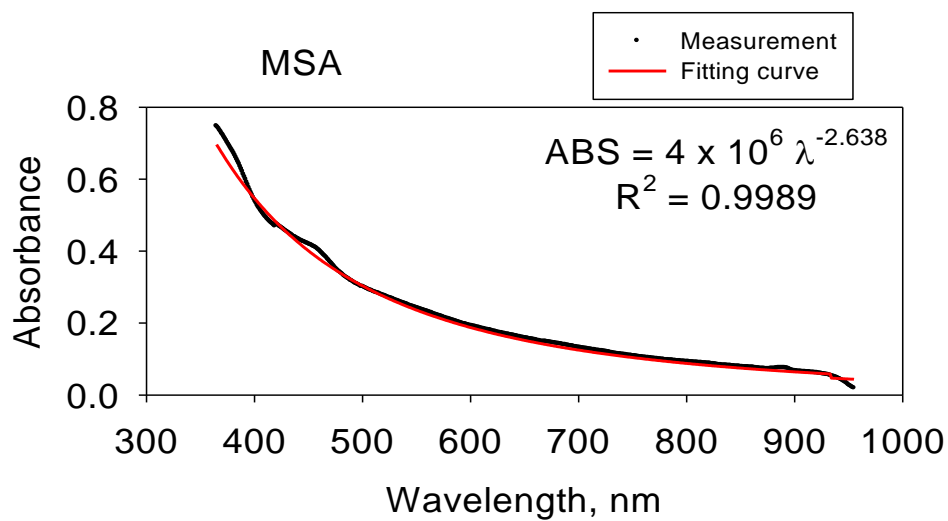

Figure S2: Absorbance of aqueous solution (ca. 3 M) of  $\text{CH}_3\text{SO}_3\text{H}$ .

Absorbance (optical absorption) of  $\text{CH}_3\text{SO}_3\text{H}$  aqueous solution was found using a spectrophotometer with 5 nm bandwidth and light wavelength accuracy of  $\pm 2$  nm (Genesis 30; Thermo Scientific). The measurable wavelength range is 325–1000 nm. Before determination,  $\text{CH}_3\text{SO}_3\text{H}$  was diluted to ca. 3 M using ultrapure water.

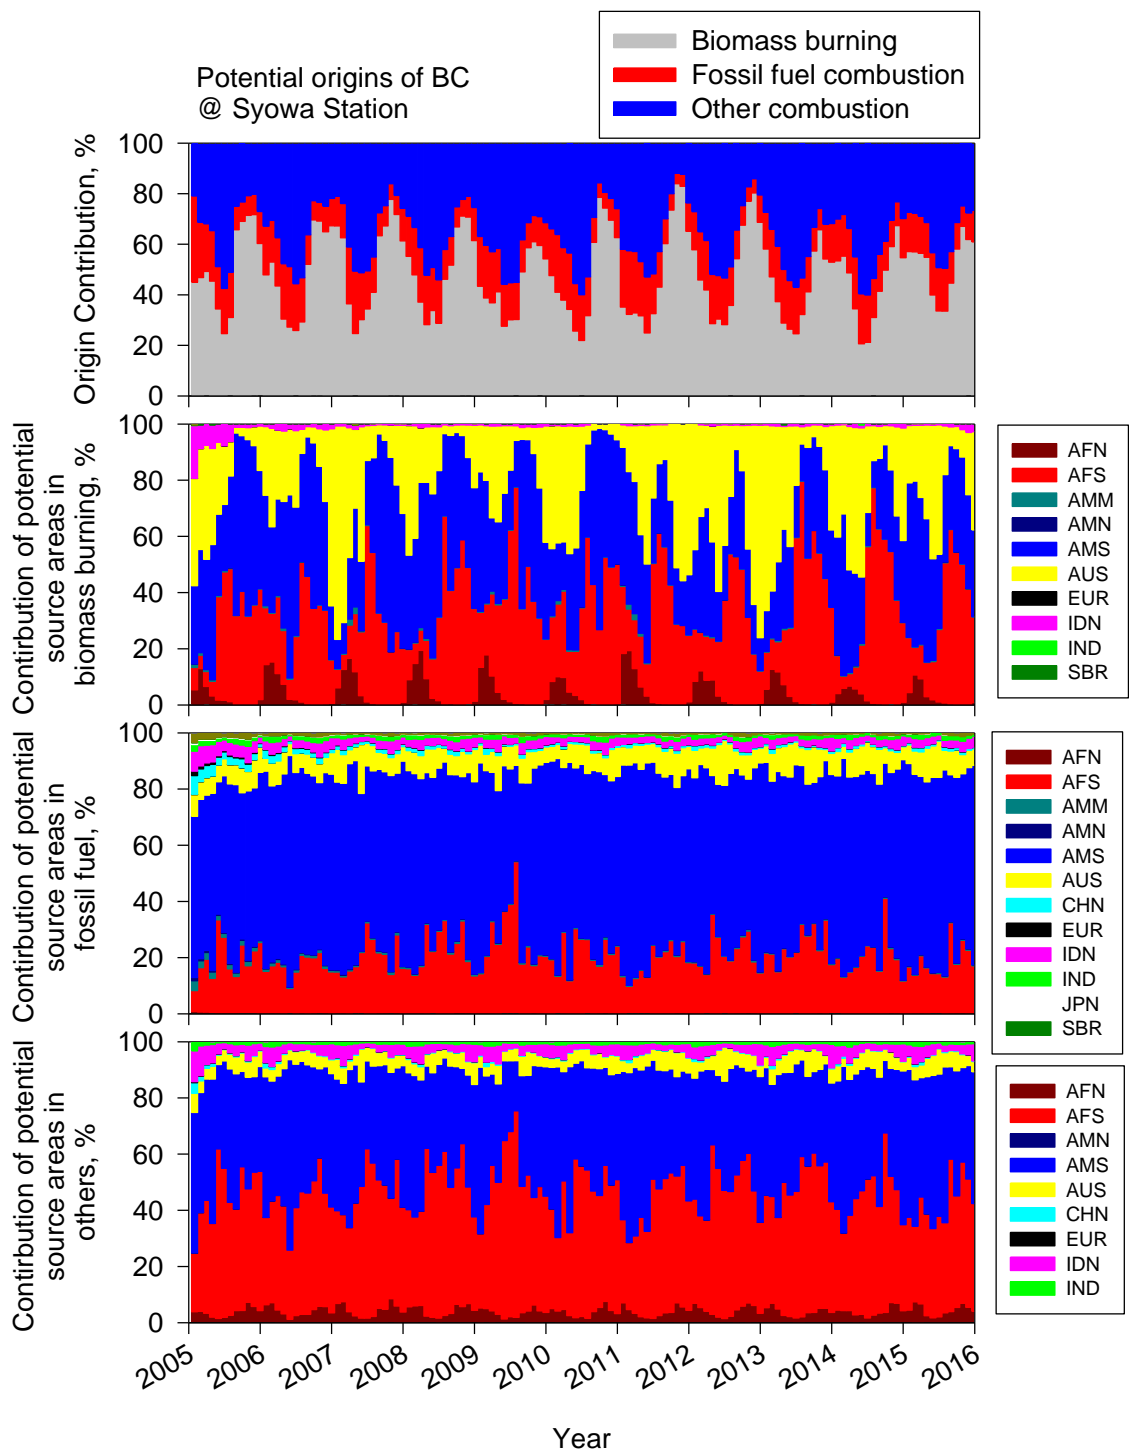

Figure S3: Seasonal features of BC origins and their PSA. AFN, AFS, AMM, AMN, AMS, AUS, EUR, CHN, IDN, IND, JPN, and SBR respectively denote northern Africa, southern Africa, Central America, North America, South America, Australia, Europe, China, Indonesia, India, Japan, and Siberia (as shown in Figure 2).

## References

- Bond, T. C., Doherty, S. J., Fahey, D. W., Forster, P. M., Berntsen, T., DeAngelo, B. J., Flanner, M. G., Ghan, S., Kärcher, B., Koch, D., Kinne, S., Kondo, Y., Quinn, P. K., Sarofim, M. C., Schultz, M. G., Schulz, M., Venkataraman, C., Zhang, H., Zhang, S., Bellouin, N., Guttikunda, S. K., Hopke, R. K., Jacobson, M. Z., Kaiser, J. W., Klimont, Z., Lohmann, U., Schwarz, J. P., Shindell, D., Storelvmo, T., Warren, S. G., and Zender, C. S.: Bounding the role of black carbon in the climate system: A scientific assessment, *Journal of Geophysical Research: Atmospheres*, 118, doi:10.1002/jgrd.50171, 2013.
- Hara, K., Osada, K., Kido, M., Hayashi, M., Matsunaga, K., Iwasaka, Y., Yamanouchi, T., Hashida, G., and Fukatsu, T.: Chemistry of sea-salt particles and inorganic halogen species in Antarctic regions: Compositional differences between coastal and inland stations, *Journal of Geophysical Research*, 109(D20), doi:10.1029/2004JD004713, 2004.
- Hara, K., Osada, K., Yabuki, M., Hashida, G., Yamanouchi, T., Hayashi, M., Shiobara, M., Nishita, C., and Wada, M.: Haze episodes at Syowa Station, coastal Antarctica: Where did they come from?, *Journal of Geophysical Research*, 115(D14), doi:10.1029/2009JD012582, 2010.
- Weingartner, E., Saathoff, H., Schnaiter, M., Streit, N., Bitnar, B., and Baltensperger, U.: Absorption of light by soot particles: determination of the absorption coefficient by means of aethalometers, *Journal of Aerosol Science*, 34, 1445–1463, doi:10.1016/S0021-8502(03)00359-8, 2003.
- Weller, R., Minikin, A., Petzold, A., Wagenbach, D., and König-Langlo, G.: Characterization of long-term and seasonal variations of black carbon (BC) concentrations at Neumayer, Antarctica, *Atmospheric Chemistry and Physics*, doi:10.5194/acp-13-1579-2013, 2013.
